# Supplementary material
Source: PubMed Central journal article supplement (PMC4188267)
Supplement: ac5021408_si_001.pdf [file ac5021408_si_001.pdf]

## Supporting Information

# Sequence-specific DNA detection at 10 fM by electromechanical signal transduction

*Leyla Esfandiari<sup>1</sup>, Michael Lorenzini<sup>1</sup>, Gayane Kocharyan<sup>1</sup>, Harold G. Monbouquette<sup>2\*</sup>, Jacob J. Schmidt<sup>1\*</sup>*

<sup>1</sup>Department of Bioengineering, University of California, Los Angeles, CA, USA

<sup>2</sup>Department of Chemical and Biomolecular Engineering, University of California, Los Angeles, CA, USA

\* Corresponding authors: hmonbouq@ucla.edu, schmidt@seas.ucla.edu

## Contents

|                                                                      |      |
|----------------------------------------------------------------------|------|
| A. Zeta potential and mobility measurements                          | S-2  |
| B. Measurement results for Target and Control DNA from 1 pM to 10 fM | S-3  |
| C. Poisson distribution estimates                                    | S-11 |
| D. Calculation of equilibrium DNA-PNA binding                        | S-13 |

## A. Zeta potential and mobility measurements

The zeta potential and electrophoretic mobility of the beads before PNA conjugation (-87 mV and  $-6.9 \times 10^{-8} \text{ m}^2/\text{Vs}$ , respectively), after PNA conjugation (-2.4 mV and  $-0.2 \times 10^{-8} \text{ m}^2/\text{Vs}$ , respectively) were measured with a Malvern Zetasizer.

Table S-1. After incubation with various DNA lengths and concentrations the zeta potential and electrophoretic mobility were measured and are listed below. In the instances where the instrument identified more than one maximum in the distribution of measurements, the values for each peak and the percentage of total area of that peak are listed.

| [DNA]  | Target |                                                 |                                                 | Control |                                               |                                                 |
|--------|--------|-------------------------------------------------|-------------------------------------------------|---------|-----------------------------------------------|-------------------------------------------------|
|        | Length | Zeta Potential (mV)<br>and % area of peak       | Mobility<br>( $10^{-8} \text{ m}^2/\text{Vs}$ ) | Length  | Zeta Potential (mV)<br>and % area of peak     | Mobility<br>( $10^{-8} \text{ m}^2/\text{Vs}$ ) |
| 1 pM   | 110    | -34.6 / 97.5%<br>6.99 / 2.5%                    | -2.71<br>0.54                                   | 125     | -8.58 / 100%                                  | -0.67                                           |
|        | 235    | -41.6 / 98.6%<br>-0.4 / 1.4%                    | -3.28<br>-0.03                                  | 184     | -32.8 / 31.6%<br>-4.61 / 68.4%                | -2.53<br>-0.36                                  |
|        | 419    | -43.6 / 100%                                    | -3.41                                           | 309     | -29.6 / 80.8%<br>4.65 / 19.2%                 | -2.29<br>0.36                                   |
|        | 1613   | -66.6 / 2.5%<br>-35.1 / 59.0%<br>-3.31 / 38.5%  | -5.22<br>-2.76<br>-0.26                         | 1503    | -34.8 / 27.3%<br>-2.63 / 72.7%                | -2.72<br>-0.21                                  |
| 100 fM | 110    | -63 / 1.4%<br>-37.7 / 98.6%                     | -4.94<br>-2.96                                  | 125     | -37.7 / 100%                                  | -2.96                                           |
|        | 235    | -46.3 / 89.2%<br>-5.89 / 10.8%                  | -3.60<br>-0.46                                  | 184     | -35.7 / 100%                                  | -2.78                                           |
|        | 419    | -43.6 / 98.9%<br>-13.8 / 1.1%                   | -3.41<br>-1.08                                  | 309     | -32.5 / 97.7%<br>6.75 / 2.3%                  | -2.53<br>0.52                                   |
|        | 1613   | -41.3 / 98.3%<br>0.01 / 1.7%                    | -3.21<br>0.01                                   | 1503    | -31.2 / 97.9%<br>6.91 / 2.1%                  | -2.44<br>0.54                                   |
| 10 fM  | 110    | -31.3 / 28.8%<br>-18.1 / 22.1%<br>-5.11 / 49.1% | -2.44<br>-1.42<br>-0.40                         | 125     | -27.7 / 73.9%<br>-8.38 / 9.2%<br>2.18 / 16.9% | -2.14<br>-0.65<br>0.17                          |
|        | 235    | -30.3 / 31%<br>-11.3 / 28.6%<br>8.93 / 37.3%    | -2.36<br>-0.88<br>0.69                          | 184     | -27.9 / 96.1%<br>7.7 / 3.9%                   | -2.15<br>0.60                                   |
|        | 419    | -38.6 / 52%<br>-2.81 / 48%                      | -3.03<br>-0.22                                  | 309     | -38.6 / 4.7%<br>-21.3 / 94.7%<br>10.5 / 0.6%  | -3.03<br>-1.65<br>0.81                          |
|        | 1613   | -43.8 / 68.6%<br>-14.7 / 13.7%<br>2.84 / 8.9%   | -3.42<br>-1.15<br>0.22                          | 1503    | -44.6 / 17.3%<br>-31.3 / 51%<br>-1.95 / 31.5% | -3.49<br>-2.44<br>-0.15                         |
| 10 fM  | 110    | -45.5 / 100%                                    | -3.55                                           | 125     | -38.0 / 89.9%<br>-5.8 / 10.1%                 | -3.00<br>-0.45                                  |
|        | 235    | -35.5 / 98.4%<br>-4.35 / 1.6%                   | -2.77<br>0.34                                   | 184     | -31.6 / 100%                                  | -2.46                                           |
|        | 419    | -41.1 / 100%                                    | -3.20                                           | 309     | -37.9 / 98.9%<br>-0.024 / 1.1%                | -2.97<br>0                                      |
|        | 1613   | -44 / 95%<br>-4.73 / 5.0%                       | -3.44<br>-0.37                                  | 1503    | -34.1 / 100%                                  | -2.66                                           |

|       |      |                                                 |                         |      |                                                |                        |
|-------|------|-------------------------------------------------|-------------------------|------|------------------------------------------------|------------------------|
| 10 fM | 110  | -34 / 95.3%<br>1.35 / 3.9%                      | -2.66<br>0.11           | 125  | -30.1 / 100%                                   | -2.35                  |
|       | 235  | -34.5 / 96.1%<br>8.55 / 3.9%                    | -2.70<br>0.66           | 184  | -36.3 / 97.3%<br>2.9 / 2.7%                    | -2.84<br>0.22          |
|       | 419  | -40.5 / 92.6%<br>-13.3 / 7.4%                   | -3.16<br>-1.04          | 309  | -31 / 73.3%<br>6.44 / 26.7%                    | -2.42<br>0.50          |
|       | 1613 | -40.7 / 86.1%<br>-13.7 / 10.6%<br>0.53 / 4.3%   | -3.20<br>-1.07<br>0.04  | 1503 | -30.1 / 100%                                   | -2.35                  |
| 1 fM  | 110  | -35.4 / 0.1%<br>-5 / 99.9%                      | -2.77<br>-0.39          | 125  | -0.27 / 100%                                   | -0.02                  |
|       | 235  | -26.6 / 27.6%<br>-11 / 47.5%<br>3.13 / 24.8%    | -2.05<br>-0.86<br>0.24  | 184  | -14.3 / 49.5%<br>4.7 / 50.5%                   | -1.11<br>0.36          |
|       | 419  | -33.8 / 11.5%<br>-19.7 / 30.9%<br>-2.42 / 57.5% | -2.65<br>-1.55<br>-0.19 | 309  | -35 / 16.7%<br>-13.6 / 57.9%<br>9.71 / 23.6%   | -2.75<br>-1.10<br>0.75 |
|       | 1613 | -18.1 / 74.8%<br>5.8 / 25.2%                    | -1.42<br>0.45           | 1503 | -35.5 / 25.3%<br>-18.2 / 6.5%<br>0.418 / 68.2% | -2.77<br>-1.43<br>0.03 |

For the PNA-beads incubated with 10 fM of 1613-mer target DNA and 30 pM of 1503-mer control DNA, the zeta potentials measured were -36.5mV (46.2%) and -22.5mV (53.8%), with corresponding mobilities of  $-2.86 \times 10^{-8} \text{ m}^2/\text{Vs}$  and  $-1.74 \times 10^{-8} \text{ m}^2/\text{Vs}$ , respectively. Control experiments, in which PNA-beads were incubated only with 30 pM of 1503-mer control DNA, yielded zeta potential of -21.7 mV (100%) and mobility of  $-1.68 \times 10^{-8} \text{ m}^2/\text{Vs}$ .

## B. Measurement results for Target and Control DNA from 1 pM to 10 fM

$I_{\text{open}}$  is the current measured in the capillary with no obstruction,  $I_{\text{block}}$  is the current measured with an obstructing bead present,  $R_{\text{open}} = 25 \text{ V}/I_{\text{open}}$ ,  $\Delta R = R_{\text{open}} - V/I_{\text{block}}$ . A Permanent block is noted if the block persisted beyond 60 sec, and was reversible when the sign of the applied voltage was reversed.

### 1 pM Target

#### 110-mer Target

No capillary blockades observed.

**Table S-2. 235-mer Target**

|          | $I_{\text{open}} (\mu\text{A})$ | $I_{\text{block}} (\mu\text{A})$ | $(I_o - I_b)/I_o$ | $R_{\text{open}} (\Omega)$ | $\Delta R (\Omega)$ | $\Delta R/R$ | Block duration (Sec) |
|----------|---------------------------------|----------------------------------|-------------------|----------------------------|---------------------|--------------|----------------------|
|          | -0.518                          | -0.436                           | 0.158             | 4.83E+07                   | 9.10E+06            | 0.200        | Permanent            |
|          | -0.527                          | -0.462                           | 0.123             | 4.74E+07                   | 6.70E+06            | 0.141        | Permanent            |
|          | -0.559                          | -0.488                           | 0.127             | 4.47E+07                   | 6.51E+06            | 0.145        | Permanent            |
|          | -0.577                          | -0.495                           | 0.142             | 4.33E+07                   | 7.20E+06            | 0.200        | Permanent            |
|          | -0.585                          | -0.522                           | 0.108             | 4.27E+07                   | 5.20E+06            | 0.121        | Permanent            |
| Average  | -0.553                          | -0.481                           | 0.132             | 4.53E+07                   | 6.91E+06            | 0.152        |                      |
| Std.Dev. | 0.027                           | 0.029                            | 0.017             | 2.20E+06                   | 1.26E+06            | 0.022        |                      |

**Table S-3. 419-mer Target**

|          | $I_{\text{open}} (\mu\text{A})$ | $I_{\text{block}} (\mu\text{A})$ | $(I_o - I_b)/I_o$ | $R_{\text{open}} (\Omega)$ | $\Delta R (\Omega)$ | $\Delta R/R$ | Block duration (Sec) |
|----------|---------------------------------|----------------------------------|-------------------|----------------------------|---------------------|--------------|----------------------|
|          | -0.617                          | -0.546                           | 0.115             | 4.11E+07                   | 5.30E+06            | 0.130        | Permanent            |
|          | -0.612                          | -0.512                           | 0.163             | 4.20E+07                   | 7.98E+06            | 0.200        | Permanent            |
|          | -0.609                          | -0.516                           | 0.153             | 4.11E+07                   | 7.40E+06            | 0.180        | Permanent            |
|          | -0.62                           | -0.529                           | 0.147             | 4.03E+07                   | 6.94E+06            | 0.172        | Permanent            |
| Average  | -0.615                          | -0.526                           | 0.144             | 4.20E+07                   | 6.90E+06            | 0.169        |                      |
| Std.Dev. | 0.004                           | 0.013                            | 0.018             | 2.83E+05                   | 1.01E+06            | 0.024        |                      |

**Table S-4. 1613-mer Target**

|          | $I_{\text{open}} (\mu\text{A})$ | $I_{\text{block}} (\mu\text{A})$ | $(I_o - I_b)/I_o$ | $R_{\text{open}} (\Omega)$ | $\Delta R (\Omega)$ | $\Delta R/R$ | Block duration (Sec) |
|----------|---------------------------------|----------------------------------|-------------------|----------------------------|---------------------|--------------|----------------------|
|          | -0.576                          | -0.512                           | 0.111             | 4.34E+07                   | 5.43E+06            | 0.125        | Permanent            |
|          | -0.53                           | -0.450                           | 0.151             | 4.72E+07                   | 8.39E+06            | 0.178        | Permanent            |
|          | -0.524                          | -0.447                           | 0.147             | 4.77E+07                   | 8.22E+06            | 0.172        | Permanent            |
|          | -0.523                          | -0.439                           | 0.161             | 4.78E+07                   | 9.15E+06            | 0.191        | Permanent            |
| Average  | -0.538                          | -0.462                           | 0.142             | 4.65E+07                   | 7.79E+06            | 0.167        |                      |
| Std.Dev. | 0.022                           | 0.029                            | 0.019             | 1.82E+06                   | 1.41E+06            | 0.025        |                      |

## 1 pM Control

### 125-mer Control

No capillary blockades detected.

**Table S-5. 184-mer control**

| $I_{\text{open}}$ ( $\mu\text{A}$ ) | $I_{\text{block}}$ ( $\mu\text{A}$ ) | $(I_o - I_b)/ I_o$ | $R_{\text{open}}$ ( $\Omega$ ) | $\Delta R$ ( $\Omega$ ) | $\Delta R/R$ | Block duration (Sec) |
|-------------------------------------|--------------------------------------|--------------------|--------------------------------|-------------------------|--------------|----------------------|
| -0.535                              | -0.458                               | 0.158              | 4.8E+07                        | 9.10E+06                | 0.20         | 7                    |
| -0.543                              | -0.421                               | 0.123              | 4.7E+07                        | 6.70E+06                | 0.141        | 5                    |

### 419-mer Control

No capillary blockades detected.

**Table S-6. 1503-mer Control**

|          | $I_{\text{open}}$ ( $\mu\text{A}$ ) | $I_{\text{block}}$ ( $\mu\text{A}$ ) | $(I_o - I_b)/ I_o$ | $R_{\text{open}}$ ( $\Omega$ ) | $\Delta R$ ( $\Omega$ ) | $\Delta R/R$ | Block duration (Sec) |
|----------|-------------------------------------|--------------------------------------|--------------------|--------------------------------|-------------------------|--------------|----------------------|
|          | -0.608                              | -0.406                               | 0.332              | 4.11E+07                       | 2.05E+07                | 0.498        | Permanent            |
|          | -0.624                              | -0.575                               | 0.079              | 4.01E+07                       | 3.41E+06                | 0.085        | 29                   |
|          | -0.636                              | -0.523                               | 0.177              | 3.93E+07                       | 8.49E+06                | 0.216        | 16                   |
| Average  | -0.623                              | -0.501                               | 0.196              | 4.02E+07                       | 1.08E+07                | 0.266        |                      |
| Std.Dev. | 0.011                               | 0.071                                | 0.104              | 7.42E+05                       | 7.14E+06                | 0.172        |                      |

## 100 fM Target

**Table S-7. 110-mer Target**

| $I_{\text{open}}$ ( $\mu\text{A}$ ) | $I_{\text{block}}$ ( $\mu\text{A}$ ) | $(I_o - I_b)/ I_o$ | $R_{\text{open}}$ ( $\Omega$ ) | $\Delta R$ ( $\Omega$ ) | $\Delta R/R$ | Block duration (Sec) |
|-------------------------------------|--------------------------------------|--------------------|--------------------------------|-------------------------|--------------|----------------------|
| -0.610                              | -0.475                               | 0.222              | 4.09E+07                       | 1.20E+07                | 0.286        | 4                    |
| -0.615                              | -0.550                               | 0.105              | 4.07E+07                       | 4.78E+06                | 0.117        | 16                   |

**Table S-8. 235-mer Target**

|          | $I_{\text{open}}$ ( $\mu\text{A}$ ) | $I_{\text{block}}$ ( $\mu\text{A}$ ) | $(I_o - I_b)/ I_o$ | $R_{\text{open}}$ ( $\Omega$ ) | $\Delta R$ ( $\Omega$ ) | $\Delta R/R$ | Block duration (Sec) |
|----------|-------------------------------------|--------------------------------------|--------------------|--------------------------------|-------------------------|--------------|----------------------|
|          | -0.574                              | -0.485                               | 0.155              | 4.36E+07                       | 7.99E+06                | 0.184        | Permanent            |
|          | -0.552                              | -0.479                               | 0.132              | 4.53E+07                       | 6.90E+06                | 0.152        | Permanent            |
|          | -0.583                              | -0.500                               | 0.143              | 4.29E+07                       | 7.15E+06                | 0.167        | Permanent            |
| Average  | -0.570                              | -0.488                               | 0.143              | 4.39E+07                       | 7.35E+06                | 0.168        |                      |
| Std.Dev. | 0.013                               | 0.009                                | 0.009              | 1.02E+06                       | 4.67E+05                | 0.013        |                      |

**Table S-9. 419-mer Target**

|          | $I_{\text{open}} (\mu\text{A})$ | $I_{\text{block}} (\mu\text{A})$ | $(I_o - I_b) / I_o$ | $R_{\text{open}} (\Omega)$ | $\Delta R (\Omega)$ | $\Delta R/R$ | Block duration (Sec) |
|----------|---------------------------------|----------------------------------|---------------------|----------------------------|---------------------|--------------|----------------------|
|          | -0.572                          | -0.353                           | 0.383               | 4.37E+07                   | 2.71E+07            | 0.621        | Permanent            |
|          | -0.574                          | -0.358                           | 0.376               | 4.36E+07                   | 2.63E+07            | 0.603        | Permanent            |
|          | -0.576                          | -0.485                           | 0.158               | 4.34E+07                   | 8.14E+06            | 0.188        | Permanent            |
|          | -0.571                          | -0.356                           | 0.377               | 4.38E+07                   | 2.64E+07            | 0.604        | Permanent            |
|          | -0.581                          | -0.4191                          | 0.279               | 4.303E+07                  | 1.66E+07            | 0.386        | Permanent            |
| Average  | -0.575                          | -0.394                           | 0.315               | 4.35E+07                   | 2.09E+07            | 0.480        |                      |
| Std.Dev. | 0.003                           | 0.052                            | 0.087               | 2.65E+05                   | 7.48E+06            | 0.170        |                      |

**Table S-10. 1613-mer Target**

|          | $I_{\text{open}} (\mu\text{A})$ | $I_{\text{block}} (\mu\text{A})$ | $(I_o - I_b) / I_o$ | $R_{\text{open}} (\Omega)$ | $\Delta R (\Omega)$ | $\Delta R/R$ | Block duration (Sec) |
|----------|---------------------------------|----------------------------------|---------------------|----------------------------|---------------------|--------------|----------------------|
|          | -0.676                          | -0.600                           | 0.112               | 3.70E+07                   | 4.67E+06            | 0.126        | Permanent            |
|          | -0.671                          | -0.599                           | 0.107               | 3.73E+07                   | 4.45E+06            | 0.119        | Permanent            |
|          | -0.639                          | -0.571                           | 0.106               | 3.91E+07                   | 4.66E+06            | 0.119        | Permanent            |
|          | -0.636                          | -0.535                           | 0.159               | 3.93E+07                   | 7.43E+06            | 0.189        | Permanent            |
|          | -0.613                          | -0.488                           | 0.203               | 4.08E+07                   | 1.04E+07            | 0.255        | Permanent            |
| Average  | -0.647                          | -0.559                           | 0.137               | 3.87E+07                   | 6.32E+06            | 0.162        |                      |
| Std.Dev. | 0.023                           | 0.043                            | 0.038               | 1.41E+06                   | 2.32E+06            | 0.054        |                      |

### 100 fM Control

No capillary blockades detected for the 125-mer, 184-mer, 309-mer, and 1503-mer control DNA.

### 10 fM Target

#### Experiment 1

##### **110-mer and 235-mer target**

No capillary blockades detected.

**Table S-11. 419-mer Target**

|          | $I_{\text{open}} (\mu\text{A})$ | $I_{\text{block}} (\mu\text{A})$ | $(I_o - I_b) / I_o$ | $R_{\text{open}} (\Omega)$ | $\Delta R (\Omega)$ | $\Delta R/R$ | Block duration (Sec) |
|----------|---------------------------------|----------------------------------|---------------------|----------------------------|---------------------|--------------|----------------------|
|          | -0.597                          | -0.478                           | 0.199               | 4.19E+07                   | 1.04E+07            | 0.249        | 2                    |
|          | -0.574                          | -0.486                           | 0.153               | 4.36E+07                   | 7.89E+07            | 0.181        | 2                    |
|          | -0.583                          | -0.465                           | 0.202               | 4.29E+07                   | 1.09E+07            | 0.254        | Permanent            |
|          | -0.579                          | -0.475                           | 0.180               | 4.32E+07                   | 9.45E+06            | 0.219        | Irreversible         |
| Average  | -0.583                          | -0.476                           | 0.184               | 4.29E+07                   | 9.66E+06            | 0.226        |                      |
| Std.Dev. | 0.009                           | 0.008                            | 0.020               | 6.23E+05                   | 1.147E+06           | 0.029        |                      |

**Table S-12. 1613-mer Target**

|          | $I_{open}$ ( $\mu A$ ) | $I_{block}$ ( $\mu A$ ) | $(I_o - I_b) / I_o$ | $R_{open}$ ( $\Omega$ ) | $\Delta R$ ( $\Omega$ ) | $\Delta R/R$ | Block duration (Sec) |
|----------|------------------------|-------------------------|---------------------|-------------------------|-------------------------|--------------|----------------------|
|          | -0.638                 | -0.542                  | 0.150               | 3.92E+07                | 6.93E+06                | 0.177        | Permanent            |
|          | -0.654                 | -0.518                  | 0.208               | 3.82E+07                | 1.00E+07                | 0.263        | Permanent            |
|          | -0.603                 | -0.527                  | 0.126               | 4.15E+07                | 5.98E+06                | 0.144        | Permanent            |
|          | -0.602                 | -0.525                  | 0.128               | 4.15E+07                | 6.09E+06                | 0.147        | Permanent            |
|          | -0.598                 | -0.524                  | 0.124               | 4.18E+07                | 5.90E+06                | 0.141        | Permanent            |
| Average  | -0.619                 | -0.527                  | 0.147               | 4.04E+07                | 6.99E+06                | 0.174        |                      |
| Std.Dev. | 0.023                  | 0.008                   | 0.032               | 1.45E+06                | 1.57E+06                | 0.046        |                      |

**Experiment 2****Table S-13. 110-mer Target**

|          | $I_{open}$ ( $\mu A$ ) | $I_{block}$ ( $\mu A$ ) | $(I_o - I_b) / I_o$ | $R_{open}$ ( $\Omega$ ) | $\Delta R$ ( $\Omega$ ) | $\Delta R/R$ | Block duration (Sec) |
|----------|------------------------|-------------------------|---------------------|-------------------------|-------------------------|--------------|----------------------|
|          | -0.514                 | -0.446                  | 0.132               | 4.86E+07                | 7.42E+06                | 0.152        | 43                   |
|          | -0.531                 | -0.451                  | 0.151               | 4.71E+07                | 8.35E+06                | 0.177        | Permanent            |
|          | -0.543                 | -0.422                  | 0.223               | 4.60E+07                | 1.32E+07                | 0.287        | Permanent            |
| Average  | -0.529                 | -0.440                  | 0.169               | 4.73E+07                | 9.66E+06                | 0.206        |                      |
| Std.Dev. | 0.012                  | 0.013                   | 0.039               | 1.07E+06                | 2.54E+06                | 0.058        |                      |

**235-mer and 419-mer Target**

No capillary blockades detected.

**Table S-14. 1613-mer Target**

|          | $I_{open}$ ( $\mu A$ ) | $I_{block}$ ( $\mu A$ ) | $(I_o - I_b) / I_o$ | $R_{open}$ ( $\Omega$ ) | $\Delta R$ ( $\Omega$ ) | $\Delta R/R$ | Block duration (Sec) |
|----------|------------------------|-------------------------|---------------------|-------------------------|-------------------------|--------------|----------------------|
|          | -0.622                 | -0.548                  | 0.119               | 4.02E+07                | 5.43E+06                | 0.135        | Permanent            |
|          | -0.614                 | -0.454                  | 0.261               | 4.07E+07                | 1.43E+07                | 0.352        | Permanent            |
|          | -0.628                 | -0.457                  | 0.272               | 3.98E+07                | 1.49E+07                | 0.374        | Permanent            |
|          | -0.6143                | -0.463                  | 0.246               | 4.07E+07                | 1.33E+07                | 0.326        | Permanent            |
|          | -0.597                 | -0.454                  | 0.240               | 4.19E+07                | 1.32E+07                | 0.315        | Permanent            |
| Average  | -0.615                 | -0.475                  | 0.228               | 4.07E+07                | 1.22E+07                | 0.301        |                      |
| Std.Dev. | 0.010                  | 0.037                   | 0.055               | 6.97E+05                | 3.46E+06                | 0.085        |                      |

**Experiment 3****110-mer and 235-mer Target**

No capillary blockades detected.



**Table S-15. 419-mer Target**

|          | $I_{open}$ ( $\mu A$ ) | $I_{block}$ ( $\mu A$ ) | $(I_o - I_b) / I_o$ | $R_{open}$ ( $\Omega$ ) | $\Delta R$ ( $\Omega$ ) | $\Delta R / R$ | Block duration (Sec) |
|----------|------------------------|-------------------------|---------------------|-------------------------|-------------------------|----------------|----------------------|
|          | -0.64                  | -0.532                  | 0.169               | 3.91E+07                | 7.93E+06                | 0.203          | Permanent            |
|          | -0.628                 | -0.536                  | 0.146               | 3.98E+07                | 6.83E+06                | 0.172          | Permanent            |
|          | -0.614                 | -0.530                  | 0.136               | 4.07E+07                | 6.43E+06                | 0.158          | Permanent            |
| Average  | -0.627                 | -0.533                  | 0.151               | 3.99E+07                | 7.07E+06                | 0.178          |                      |
| Std.Dev. | 0.011                  | 0.002                   | 0.013               | 6.74E+05                | 6.33E+05                | 0.019          |                      |

**Table S-16. 1613-mer Target**

|          | $I_{open}$ ( $\mu A$ ) | $I_{block}$ ( $\mu A$ ) | $(I_o - I_b) / I_o$ | $R_{open}$ ( $\Omega$ ) | $\Delta R$ ( $\Omega$ ) | $\Delta R / R$ | Block duration (Sec) |
|----------|------------------------|-------------------------|---------------------|-------------------------|-------------------------|----------------|----------------------|
|          | -0.626                 | -0.506                  | 0.192               | 3.99E+07                | 9.47E+06                | 0.237          | Permanent            |
|          | -0.632                 | -0.544                  | 0.139               | 3.96E+07                | 6.40E+06                | 0.162          | Permanent            |
|          | -0.629                 | -0.534                  | 0.151               | 3.97E+07                | 7.07E+06                | 0.178          | Permanent            |
|          | -0.643                 | -0.547                  | 0.149               | 3.89E+07                | 6.82E+06                | 0.176          | Permanent            |
| Average  | -0.633                 | -0.533                  | 0.158               | 3.95E+07                | 7.44E+06                | 0.188          |                      |
| Std.Dev. | 0.006                  | 0.016                   | 0.020               | 3.98E+05                | 1.2E+06                 | 0.029          |                      |

### 10 fM Control

#### Experiment 1

##### 125-mer, 184-mer, and 309-mer control

No capillary blockades detected.

**Table S-17. 1503-mer Control**

|          | $I_{open}$ ( $\mu A$ ) | $I_{block}$ ( $\mu A$ ) | $(I_o - I_b) / I_o$ | $R_{open}$ ( $\Omega$ ) | $\Delta R$ ( $\Omega$ ) | $\Delta R / R$ | Block duration (Sec) |
|----------|------------------------|-------------------------|---------------------|-------------------------|-------------------------|----------------|----------------------|
|          | -0.560                 | -0.484                  | 0.135               | 4.47E+07                | 6.98E+06                | 0.156          | 20                   |
|          | -0.592                 | -0.425                  | 0.283               | 4.22E+07                | 1.66E+07                | 0.394          | 37                   |
|          | -0.587                 | -0.477                  | 0.188               | 4.26E+07                | 9.83E+06                | 0.231          | 21                   |
| Average  | -0.580                 | -0.462                  | 0.202               | 4.31E+07                | 1.11E+07                | 0.260          |                      |
| Std.Dev. | 0.014                  | 0.026                   | 0.061               | 1.08E+06                | 4.05E+06                | 0.099          |                      |

#### Experiment 2

**Table S-18. 125-mer Control**

|  | $I_{open}$ ( $\mu A$ ) | $I_{block}$ ( $\mu A$ ) | $(I_o - I_b) / I_o$ | $R_{open}$ ( $\Omega$ ) | $\Delta R$ ( $\Omega$ ) | $\Delta R / R$ | Block duration (Sec) |
|--|------------------------|-------------------------|---------------------|-------------------------|-------------------------|----------------|----------------------|
|  | -0.557                 | -0.465                  | 0.165               | 4.48E+07                | 8.96E+06                | 0.201          | 2                    |

### 184-mer and 309-mer Control

No capillary blockades detected.

**Table S-19. 1503-mer Control**

|          | $I_{\text{open}} (\mu\text{A})$ | $I_{\text{block}} (\mu\text{A})$ | $(I_o - I_b) / I_o$ | $R_{\text{open}} (\Omega)$ | $\Delta R (\Omega)$ | $\Delta R / R$ | Block duration (Sec) |
|----------|---------------------------------|----------------------------------|---------------------|----------------------------|---------------------|----------------|----------------------|
|          | -0.614                          | -0.497                           | 0.191               | 4.07E+07                   | 9.60E+06            | 0.236          | 14                   |
|          | -0.622                          | -0.406                           | 0.347               | 4.02E+07                   | 2.14E+07            | 0.532          | 2                    |
|          | -0.589                          | -0.487                           | 0.173               | 4.24E+07                   | 8.89E+06            | 0.209          | 10                   |
| Average  | -0.608                          | -0.463                           | 0.237               | 4.11E+07                   | 1.33E+07            | 0.326          |                      |
| Std.Dev. | 0.014                           | 0.041                            | 0.078               | 9.64E+05                   | 5.73E+06            | 0.146          |                      |

### Experiment 3

#### 125-mer Control

No capillary blockades detected.

**Table S-20. 184-mer Control**

| $I_{\text{open}} (\mu\text{A})$ | $I_{\text{block}} (\mu\text{A})$ | $(I_o - I_b) / I_o$ | $R_{\text{open}} (\Omega)$ | $\Delta R (\Omega)$ | $\Delta R / R$ | Block duration (Sec) |
|---------------------------------|----------------------------------|---------------------|----------------------------|---------------------|----------------|----------------------|
| -0.552                          | -0.483                           | 0.123               | 4.53E+07                   | 6.46E+06            | 0.143          | 2                    |

#### 309-mer Control

No capillary blockades detected.

**Table S-21. 1503mer Control, Ex.3**

| $I_{\text{open}} (\mu\text{A})$ | $I_{\text{block}} (\mu\text{A})$ | $(I_o - I_b) / I_o$ | $R_{\text{open}} (\Omega)$ | $\Delta R (\Omega)$ | $\Delta R / R$ | Block duration (Sec) |
|---------------------------------|----------------------------------|---------------------|----------------------------|---------------------|----------------|----------------------|
| -0.581                          | -0.462                           | 0.205               | 4.30E+07                   | 1.11E+07            | 0.258          | 13                   |
| -0.572                          | -0.481                           | 0.159               | 4.37E+07                   | 8.27E+06            | 0.189          | 5                    |

### 1 fM Target and Control

No permanent or transient blocks observed for any target or control DNA oligomer.

# 10 fM 1613-mer Target in presence of 30 pM 1503-mer control background

Table S-22.

| $I_{\text{open}}$ ( $\mu\text{A}$ ) | $I_{\text{block}}$ ( $\mu\text{A}$ ) | $(I_o - I_b) / I_o$ | $R_{\text{open}}$ ( $\Omega$ ) | $\Delta R$ ( $\Omega$ ) | $\Delta R/R$ | Block duration (Sec) |
|-------------------------------------|--------------------------------------|---------------------|--------------------------------|-------------------------|--------------|----------------------|
| -0.565                              | -0.487                               | 0.138               | 4.42E+07                       | 7.09E+06                | 0.160        | 6                    |
| -0.578                              | -0.464                               | 0.197               | 4.33E+07                       | 1.06E+07                | 0.246        | 4                    |
| -0.596                              | -0.433                               | 0.273               | 4.19E+07                       | 1.58E+07                | 0.376        | 4                    |
| -0.579                              | -0.478                               | 0.174               | 4.32E+07                       | 9.12E+06                | 0.211        | Permanent            |
| -0.567                              | -0.440                               | 0.224               | 4.41E+07                       | 1.28E+07                | 0.289        | Permanent            |
| -0.619                              | -0.475                               | 0.233               | 4.04E+07                       | 1.22E+07                | 0.303        | 3                    |
| -0.623                              | -0.481                               | 0.228               | 4.01E+07                       | 1.19E+07                | 0.295        | 3                    |
| -0.596                              | -0.481                               | 0.193               | 4.19E+07                       | 1.00E+07                | 0.239        | 8                    |
| -0.589                              | -0.493                               | 0.162               | 4.24E+07                       | 8.23E+06                | 0.194        | Permanent            |
| -0.587                              | -0.375                               | 0.361               | 4.27E+07                       | 2.41E+07                | 0.566        | Permanent            |
| -0.614                              | -0.464                               | 0.244               | 4.07E+07                       | 1.32E+07                | 0.323        | Permanent            |
| -0.564                              | -0.413                               | 0.268               | 4.43E+07                       | 1.62E+07                | 0.366        | Permanent            |
| -0.625                              | -0.403                               | 0.355               | 4.00E+07                       | 2.20E+07                | 0.551        | Permanent            |
| -0.625                              | -0.532                               | 0.149               | 4.00E+07                       | 6.99E+06                | 0.175        | 14                   |
| -0.598                              | -0.484                               | 0.191               | 4.18E+07                       | 9.85E+06                | 0.236        | 7                    |
| -0.597                              | -0.464                               | 0.223               | 4.19E+07                       | 1.20E+07                | 0.287        | Permanent            |
| -0.634                              | -0.458                               | 0.278               | 3.94E+07                       | 1.52E+07                | 0.384        | Permanent            |
| -0.581                              | -0.486                               | 0.164               | 4.30E+07                       | 8.41E+06                | 0.195        | Permanent            |
| -0.592                              | -0.415                               | 0.299               | 4.22E+07                       | 1.80E+07                | 0.427        | Permanent            |
| Average                             | -0.596                               | -0.459              | 4.02E+07                       | 1.28E+07                | 0.307        |                      |
| Std.Dev.                            | 0.021                                | 0.040               | 1.48E+06                       | 4.64E+06                | 0.113        |                      |

No permanent or transient blocks observed for 30pM 1503-mer control DNA measured alone.

**C. Poisson distribution estimating amount of beads bound to different DNA counts for different DNA concentration and total bead count**

**Table S-23. Poisson distribution calculation for 10 fM DNA concentration ( $2.1 \times 10^6$  beads).**

| DNA concentration | Number of target DNA | Number of beads   | Average # of target DNA per bead ( $\mu$ ) | # of bound DNA (v) | Percent of beads bound to v target DNA | #of beads with v bound DNA |
|-------------------|----------------------|-------------------|--------------------------------------------|--------------------|----------------------------------------|----------------------------|
| 10fM              | $6.02 \times 10^5$   | $2.1 \times 10^6$ | 0.287                                      | 0                  | 75.07619%                              | 1576600                    |
|                   |                      |                   |                                            | 1                  | 21.52184%                              | 451958                     |
|                   |                      |                   |                                            | 2                  | 3.084797%                              | 64780                      |
|                   |                      |                   |                                            | 3                  | 0.29477%                               | 6190                       |
|                   |                      |                   |                                            | 4                  | 0.021125%                              | 443                        |
|                   |                      |                   |                                            | 5                  | 0.00121%                               | 25                         |
|                   |                      |                   |                                            | 6                  | 0.00006%                               | 1                          |

**Table S-24. Poisson distribution calculation for 1 fM DNA concentration ( $2.1 \times 10^6$  beads).**

| DNA concentration | Number of target DNA | Number of beads   | Average # of target DNA per bead ( $\mu$ ) | # of bound DNA (v) | Percent of beads bound to v target DNA | #of beads with v bound DNA |
|-------------------|----------------------|-------------------|--------------------------------------------|--------------------|----------------------------------------|----------------------------|
| 1fM               | $6.02 \times 10^4$   | $2.1 \times 10^6$ | 0.0287                                     | 0                  | 97.17403%                              | 2040654                    |
|                   |                      |                   |                                            | 1                  | 2.78566%                               | 58498                      |
|                   |                      |                   |                                            | 2                  | 0.03993%                               | 838                        |
|                   |                      |                   |                                            | 3                  | 0.00038%                               | 8                          |

**Table S-25. Poisson distribution calculation for 1 fM DNA concentration ( $2.1 \times 10^5$  beads).**

| DNA concentration | Number of target DNA | Number of beads   | Average # of target DNA per bead ( $\mu$ ) | # of bound DNA (v) | Percent of beads bound to v target DNA | #of beads with v bound DNA |
|-------------------|----------------------|-------------------|--------------------------------------------|--------------------|----------------------------------------|----------------------------|
| 1fM               | $6.02 \times 10^4$   | $2.1 \times 10^5$ | 0.287                                      | 0                  | 75.07619%                              | 157660                     |
|                   |                      |                   |                                            | 1                  | 21.52184%                              | 45195                      |
|                   |                      |                   |                                            | 2                  | 3.08479%                               | 6478                       |
|                   |                      |                   |                                            | 3                  | 0.29477%                               | 619                        |
|                   |                      |                   |                                            | 4                  | 0.02113%                               | 44                         |
|                   |                      |                   |                                            | 5                  | 0.00121%                               | 2                          |

**Table S-26. Poisson distribution calculation for 1 fM DNA concentration ( $2.1 \times 10^4$  beads).**

| DNA concentration | Number of target DNA | Number of beads | Average # of target DNA | # of bound | Percent of beads bound to v target | #of beads with v |
|-------------------|----------------------|-----------------|-------------------------|------------|------------------------------------|------------------|
|-------------------|----------------------|-----------------|-------------------------|------------|------------------------------------|------------------|

|     | DNA                |                   | per bead ( $\mu$ ) | DNA (v) | DNA        | bound DNA |
|-----|--------------------|-------------------|--------------------|---------|------------|-----------|
| 1fM | $6.02 \times 10^4$ | $2.1 \times 10^4$ | 2.87               | 0       | 5.68882%   | 1194      |
|     |                    |                   |                    | 1       | 16.30796%  | 3424      |
|     |                    |                   |                    | 2       | 23.37475%  | 4908      |
|     |                    |                   |                    | 3       | 22.33587%  | 4690      |
|     |                    |                   |                    | 4       | 16.00737%  | 3361      |
|     |                    |                   |                    | 5       | 9.17759%   | 1927      |
|     |                    |                   |                    | 6       | 4.38483%   | 920       |
|     |                    |                   |                    | 7       | 1.79569%   | 377       |
|     |                    |                   |                    | 8       | 0.643457%  | 135       |
|     |                    |                   |                    | 9       | 0.204953%  | 43        |
|     |                    |                   |                    | 10      | 0.058753%  | 12        |
|     |                    |                   |                    | 11      | 0.015311%  | 3         |
|     |                    |                   |                    | 12      | 0.0036577% | 1         |

## D. Calculation of equilibrium DNA-PNA binding

Assuming a first order association between DNA in solution and PNA groups on the bead surfaces

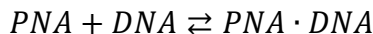

$$K_{eq} = \frac{[PNA \cdot DNA]}{[PNA][DNA]} = \frac{[PNA \cdot DNA]}{([PNA]_{tot} - [PNA \cdot DNA])([DNA]_{tot} - [PNA \cdot DNA])}$$

Defining the DNA bound fraction:  $f_{bound} \equiv \frac{[PNA \cdot DNA]}{[DNA]_{tot}}$

$$\frac{1}{K_{eq}} = ([PNA]_{tot} - f_{bound}[DNA]_{tot}) \left( \frac{1}{f_{bound}} - 1 \right)$$

$$f_{bound} = \frac{[PNA]_{tot} + [DNA]_{tot} + \frac{1}{K_{eq}} \pm \sqrt{\left([PNA]_{tot} + [DNA]_{tot} + \frac{1}{K_{eq}}\right)^2 - 4[PNA]_{tot}[DNA]_{tot}}}{2[DNA]_{tot}}$$

For carboxylic acid modified polystyrene beads, there are  $\sim 10^7$  carboxylic acid groups on the surface. (Thomson, D.; Dimitrov, K.; Cooper, M. *Analyst* **2011**, 136, 1599-1607.)

Conservatively estimating that only 10% of these groups are functionalized, we have  $10^6$  PNA molecules per bead. In the experiments described in the manuscript,  $2.1 \times 10^6$  beads were used in a 100  $\mu$ L reaction volume, giving a PNA concentration of 35 nM. Using  $K_{eq} = 10^9 \text{ M}^{-1}$  (Park et al. *Biointerphases* 1(4), 113-122 (2006)), which applies to surface-bound PNA and a low concentration of bound DNA, we find 97.2% for the bound fraction for the target DNA concentrations ( $[DNA]_{tot}$ ) tested.

Note that for free 12-mer PNA, the binding constant to DNA is expected to be in the  $10^{13}$ - $10^{14} \text{ M}^{-1}$  range (Ratilainen et al. *Biochemistry*, 39, 7781-7791 (2000)). If the value of  $K_{eq}$  in our case is closer to this range, the fraction of bound DNA would be substantially higher. Thus, our use of the Poisson distribution to calculate the distribution of target DNA molecules among beads, which assumes that all DNA is bound, likely gives meaningful estimates.
